# Supplementary material for: Mycotoxin Decontamination Efficacy of Atmospheric Pressure Air Plasma
Source: MDPI journal article supplement (doi:10.3390/toxins11040219), 2019-04-12
Supplement: s1 [file s1]

## Supplementary Materials: Mycotoxin Decontamination Efficacy of Atmospheric Pressure Air Plasma

Nataša Hojnik, Martina Modic, Gabrijela Tavčar-Kalcher, Janja Babič, James L. Walsh and Uroš Cvelbar

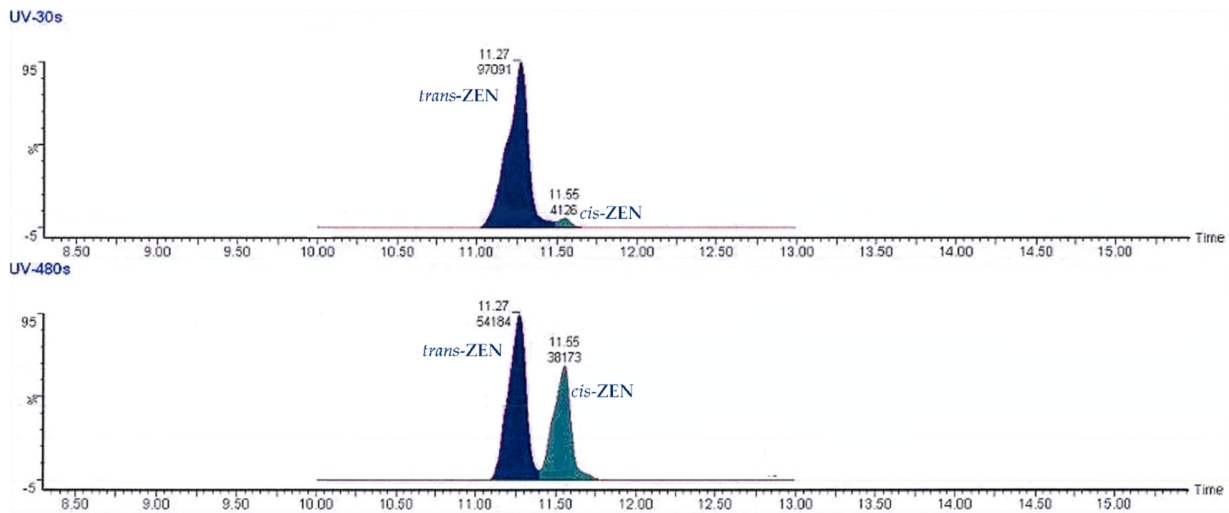

Figure 1. Chromatogram of ZEN obtained after the exposure to UVC irradiation.

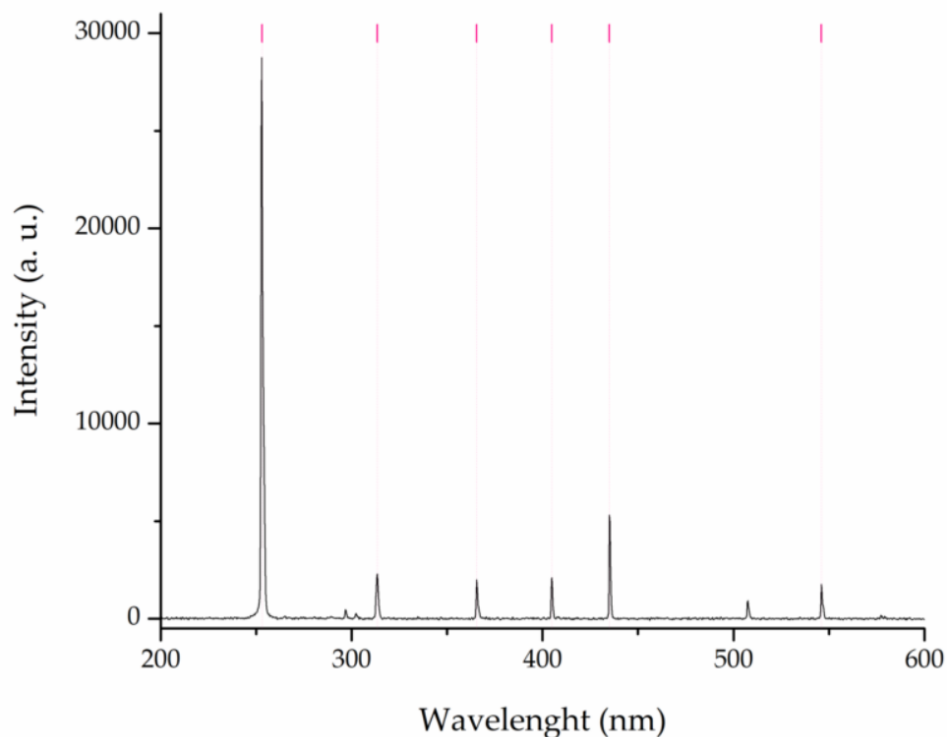

Figure 2. Hg intensity lines of UVC germicidal lamp.
